# Supplementary material for: The Hydrological-Hydrochemical Factors that Control the Invasion of the Black Locust (Robinia pseudoacacia L.) in Succession in Areas with Opencast Mines
Source: Plants (Basel). 2020 Dec 25;10(1):40. doi: 10.3390/plants10010040 (PMC7824616; doi:10.3390/plants10010040)
Supplement: Supplementary file 1 [file plants-10-00040-s001.xlsx]

## Sheet: species data
	habitat	mean percent cover	sd
Acer pseudoplatanus	R	-	-		SH – sand heaps,
Acer pseudoplatanus	SH	-	-		ST – sandy bottom of sedimentation tank,
Acer pseudoplatanus	ST	0.12500000	0.3535534		WT – wetlands
Acer pseudoplatanus	WT	-	-		R - reference site, forest
Achillea millefolium	R	0.16666667	0.4082483
Achillea millefolium	SH	1.09090909	3.0151134
Achillea millefolium	ST	0.25000000	0.7071068
Achillea millefolium	WT	-	-
Agrostis capillaris	R	0.16666667	0.4082483
Agrostis capillaris	SH	-	-
Agrostis capillaris	ST	-	-
Agrostis capillaris	WT	-	-
Agrostis stolonifera	R	0.16666667	0.4082483
Agrostis stolonifera	SH	0.54545455	1.5075567
Agrostis stolonifera	ST	-	-
Agrostis stolonifera	WT	-	-
Alisma plantago aquatica	R	-	-
Alisma plantago aquatica	SH	-	-
Alisma plantago aquatica	ST	-	-
Alisma plantago aquatica	WT	0.20000000	0.4472136
Arrhenatherum elatius	R	7.50000000	16.0468065
Arrhenatherum elatius	SH	-	-
Arrhenatherum elatius	ST	-	-
Arrhenatherum elatius	WT	-	-
Artemisia vulgaris	R	-	-
Artemisia vulgaris	SH	0.13636364	0.3233349
Artemisia vulgaris	ST	-	-
Artemisia vulgaris	WT	-	-
Avena fatua	R	-	-
Avena fatua	SH	0.09090909	0.3015113
Avena fatua	ST	-	-
Avena fatua	WT	-	-
Barbarea vulgaris	R	-	-
Barbarea vulgaris	SH	-	-
Barbarea vulgaris	ST	0.12500000	0.3535534
Barbarea vulgaris	WT	0.40000000	0.8944272
Betula pendula b	R	-	-
Betula pendula b	SH	0.54545455	1.5075567
Betula pendula b	ST	-	-
Betula pendula b	WT	-	-
Betula pendula	R	-	-
Betula pendula	SH	-	-
Betula pendula	ST	0.62500000	1.7677670
Betula pendula	WT	1.40000000	2.1908902
Calamagrostis epigeios	R	9.16666667	15.6258333
Calamagrostis epigeios	SH	13.72727273	25.7452555
Calamagrostis epigeios	ST	-	-
Calamagrostis epigeios	WT	-	-
Carex fusca	R	-	-
Carex fusca	SH	-	-
Carex fusca	ST	-	-
Carex fusca	WT	2.00000000	2.7386128
Carlina vulgaris	R	-	-
Carlina vulgaris	SH	-	-
Carlina vulgaris	ST	0.12500000	0.3535534
Carlina vulgaris	WT	-	-
Chelidonium majus	R	1.66666667	4.0824829
Chelidonium majus	SH	0.09090909	0.3015113
Chelidonium majus	ST	-	-
Chelidonium majus	WT	-	-
Chenopodium album	R	11.66666667	28.5773803
Chenopodium album	SH	0.45454545	1.5075567
Chenopodium album	ST	-	-
Chenopodium album	WT	-	-
Cladonia sp	R	-	-
Cladonia sp	SH	-	-
Cladonia sp	ST	0.12500000	0.3535534
Cladonia sp	WT	-	-
Convallaria majalis	R	8.33333333	16.0208198
Convallaria majalis	SH	-	-
Convallaria majalis	ST	-	-
Convallaria majalis	WT	-	-
Corylus avellana b	R	13.33333333	20.6559112
Corylus avellana b	SH	-	-
Corylus avellana b	ST	-	-
Corylus avellana b	WT	-	-
Corynephorus cansecens	R	-	-
Corynephorus cansecens	SH	8.63636364	12.2659914
Corynephorus cansecens	ST	8.75000000	17.0608156
Corynephorus cansecens	WT	-	-
Conyza canadensis	R	-	-
Conyza canadensis	SH	0.18181818	0.6030227
Conyza canadensis	ST	0.12500000	0.3535534
Conyza canadensis	WT	1.00000000	2.2360680
Cynodon dactylon	R	-	-
Cynodon dactylon	SH	-	-
Cynodon dactylon	ST	4.37500000	7.2886899
Cynodon dactylon	WT	-	-
Dactylis glomerata	R	0.83333333	2.0412415
Dactylis glomerata	SH	0.90909091	3.0151134
Dactylis glomerata	ST	-	-
Dactylis glomerata	WT	-	-
Deschampsia caespitosa	R	-	-
Deschampsia caespitosa	SH	0.09090909	0.3015113
Deschampsia caespitosa	ST	-	-
Deschampsia caespitosa	WT	-	-
Dianthus armeria	R	-	-
Dianthus armeria	SH	0.09090909	0.3015113
Dianthus armeria	ST	-	-
Dianthus armeria	WT	-	-
Eleocharis plaustris	R	-	-
Eleocharis plaustris	SH	-	-
Eleocharis plaustris	ST	0.25000000	0.7071068
Eleocharis plaustris	WT	1.00000000	2.2360680
Epilobium hirsutum	R	-	-
Epilobium hirsutum	SH	-	-
Epilobium hirsutum	ST	-	-
Epilobium hirsutum	WT	0.20000000	0.4472136
Epilobium adenocaulon	R	-	-
Epilobium adenocaulon	SH	0.09090909	0.3015113
Epilobium adenocaulon	ST	-	-
Epilobium adenocaulon	WT	1.80000000	2.0493902
Erigeron acre	R	-	-
Erigeron acre	SH	1.18181818	1.9908883
Erigeron acre	ST	0.12500000	0.3535534
Erigeron acre	WT	-	-
Erigeron annuus	R	-	-
Erigeron annuus	SH	2.36363636	7.5136240
Erigeron annuus	ST	0.12500000	0.3535534
Erigeron annuus	WT	0.40000000	0.8944272
Euphorbia cyparissias	R	0.50000000	0.8366600
Euphorbia cyparissias	SH	-	-
Euphorbia cyparissias	ST	-	-
Euphorbia cyparissias	WT	-	-
Evonymus europaea b	R	0.83333333	2.0412415
Evonymus europaea b	SH	-	-
Evonymus europaea b	ST	-	-
Evonymus europaea b	WT	-	-
Equisetum palustre	R	-	-
Equisetum palustre	SH	-	-
Equisetum palustre	ST	-	-
Equisetum palustre	WT	6.00000000	4.1833001
Fallopia dumetorum	R	1.16666667	2.0412415
Fallopia dumetorum	SH	0.09090909	0.3015113
Fallopia dumetorum	ST	-	-
Fallopia dumetorum	WT	-	-
Frangula alnus	R	0.33333333	0.8164966
Frangula alnus	SH	-	-
Frangula alnus	ST	-	-
Frangula alnus	WT	-	-
Galium aparine	R	1.66666667	4.0824829
Galium aparine	SH	0.45454545	1.5075567
Galium aparine	ST	-	-
Galium aparine	WT	-	-
Galium mollugo	R	0.83333333	2.0412415
Galium mollugo	SH	-	-
Galium mollugo	ST	-	-
Galium mollugo	WT	-	-
Galeopsis pubescens	R	9.16666667	20.1038968
Galeopsis pubescens	SH	0.27272727	0.6466698
Galeopsis pubescens	ST	-	-
Galeopsis pubescens	WT	-	-
Geranium pumilum	R	-	-
Geranium pumilum	SH	0.18181818	0.6030227
Geranium pumilum	ST	-	-
Geranium pumilum	WT	-	-
Hieracium murorum	R	0.83333333	2.0412415
Hieracium murorum	SH	-	-
Hieracium murorum	ST	-	-
Hieracium murorum	WT	-	-
Holcus lanatus	R	-	-
Holcus lanatus	SH	-	-
Holcus lanatus	ST	1.25000000	3.5355339
Holcus lanatus	WT	14.00000000	31.3049517
Hypericum perforatum	R	-	-
Hypericum perforatum	SH	0.18181818	0.6030227
Hypericum perforatum	ST	-	-
Hypericum perforatum	WT	-	-
Impatiens parviflora	R	4.16666667	6.6458007
Impatiens parviflora	SH	-	-
Impatiens parviflora	ST	-	-
Impatiens parviflora	WT	-	-
Juncus articulatus	R	-	-
Juncus articulatus	SH	-	-
Juncus articulatus	ST	-	-
Juncus articulatus	WT	1.00000000	2.2360680
Knautia arvensis	R	0.33333333	0.8164966
Knautia arvensis	SH	-	-
Knautia arvensis	ST	-	-
Knautia arvensis	WT	-	-
Lamium maculatum	R	0.33333333	0.8164966
Lamium maculatum	SH	-	-
Lamium maculatum	ST	-	-
Lamium maculatum	WT	-	-
Leontodon hispidus	R	-	-
Leontodon hispidus	SH	-	-
Leontodon hispidus	ST	0.62500000	1.7677670
Leontodon hispidus	WT	-	-
Lycopus europaeus	R	-	-
Lycopus europaeus	SH	-	-
Lycopus europaeus	ST	-	-
Lycopus europaeus	WT	0.40000000	0.8944272
Lythrum salicaria	R	-	-
Lythrum salicaria	SH	-	-
Lythrum salicaria	ST	-	-
Lythrum salicaria	WT	1.20000000	2.1679483
Milium effusum	R	11.66666667	28.5773803
Milium effusum	SH	-	-
Milium effusum	ST	-	-
Milium effusum	WT	-	-
Oenothera biennis	R	-	-
Oenothera biennis	SH	3.18181818	4.0451992
Oenothera biennis	ST	7.75000000	6.7981090
Oenothera biennis	WT	1.00000000	2.2360680
Padus avium b	R	1.66666667	4.0824829
Padus avium b	SH	-	-
Padus avium b	ST	-	-
Padus avium b	WT	-	-
Padus avium	R	0.83333333	2.0412415
Padus avium	SH	-	-
Padus avium	ST	-	-
Padus avium	WT	-	-
Papaver rhoeas	R	-	-
Papaver rhoeas	SH	0.45454545	0.8201995
Papaver rhoeas	ST	-	-
Papaver rhoeas	WT	-	-
Picris hieracioides	R	-	-
Picris hieracioides	SH	2.00000000	3.3166248
Picris hieracioides	ST	-	-
Picris hieracioides	WT	-	-
Phalaris arundinacea	R	-	-
Phalaris arundinacea	SH	-	-
Phalaris arundinacea	ST	-	-
Phalaris arundinacea	WT	18.00000000	40.2492236
Phragmites australis	R	0.16666667	0.4082483
Phragmites australis	SH	-	-
Phragmites australis	ST	3.75000000	7.4402381
Phragmites australis	WT	32.00000000	37.0135110 3
Poa compressa	R	-	-
Poa compressa	SH	0.90909091	2.0225996
Poa compressa	ST	-	-
Poa compressa	WT	-	-
Poa nemoralis	R	0.83333333	2.0412415
Poa nemoralis	SH	0.04545455	0.1507557
Poa nemoralis	ST	-	-
Poa nemoralis	WT	-	-
Poa pratensis	R	-	-
Poa pratensis	SH	2.72727273	9.0453403
Poa pratensis	ST	-	-
Poa pratensis	WT	-	-
Polygonatum multiflorum	R	1.66666667	2.5819889
Polygonatum multiflorum	SH	-	-
Polygonatum multiflorum	ST	-	-
Polygonatum multiflorum	WT	-	-
Polygonum lapathifolium	R	0.16666667	0.4082483
Polygonum lapathifolium	SH	-	-
Polygonum lapathifolium	ST	0.12500000	0.3535534
Polygonum lapathifolium	WT	-	-
Polygonum sp	R	-	-
Polygonum sp	SH	-	-
Polygonum sp	ST	-	-
Polygonum sp	WT	0.40000000	0.8944272
Polytrichum commune	R	-	-
Polytrichum commune	SH	-	-
Polytrichum commune	ST	-	-
Polytrichum commune	WT	10.00000000	22.3606798
Populus sp	R	-	-
Populus sp	SH	-	-
Populus sp	ST	0.62500000	1.7677670
Populus sp	WT	-	-
Prunus serotina b	R	3.33333333	8.1649658
Prunus serotina b	SH	0.45454545	1.5075567
Prunus serotina b	ST	-	-
Prunus serotina b	WT	-	-
Prunus serotina	R	0.83333333	2.0412415
Prunus serotina	SH	-	-
Prunus serotina	ST	0.12500000	0.3535534
Prunus serotina	WT	-	-
Pteridium aquilinum	R	8.33333333	20.4124145
Pteridium aquilinum	SH	-	-
Pteridium aquilinum	ST	-	-
Pteridium aquilinum	WT	-	-
Quercus robur a	R	20.83333333	27.6435647 1
Quercus robur a	SH	2.72727273	9.0453403
Quercus robur a	ST	-	-
Quercus robur a	WT	-	-
Quercus robur b	R	6.66666667	16.3299316
Quercus robur b	SH	-	-
Quercus robur b	ST	-	-
Quercus robur b	WT	-	-
Quercus robur	R	0.08333333	0.2041241
Quercus robur	SH	0.95454545	1.5565113
Quercus robur	ST	-	-
Quercus robur	WT	-	-
Quercus rubra a	R	21.66666667	34.8807492
Quercus rubra a	SH	-	-
Quercus rubra a	ST	-	-
Quercus rubra a	WT	-	-
Quercus rubra b	R	0.83333333	2.0412415
Quercus rubra b	SH	-	-
Quercus rubra b	ST	-	-
Quercus rubra b	WT	-	-
Quercus rubra	R	1.66666667	4.0824829
Quercus rubra	SH	-	-
Quercus rubra	ST	-	-
Quercus rubra	WT	-	-
Robinia pseudoacacia a	R	21.66666667	29.9443929
Robinia pseudoacacia a	SH	13.63636364	23.3549683
Robinia pseudoacacia a	ST	-	-
Robinia pseudoacacia a	WT	-	-
Robinia pseudoacacia b	R	9.16666667	16.2532048
Robinia pseudoacacia b	SH	18.63636364	20.9870090 1
Robinia pseudoacacia b	ST	3.12500000	8.8388348
Robinia pseudoacacia b	WT	-	-
Robinia pseudoacacia	R	0.83333333	2.0412415
Robinia pseudoacacia	SH	4.09090909	9.1701095
Robinia pseudoacacia	ST	3.75000000	7.4402381
Robinia pseudoacacia	WT	-	-
Rubus idaeus	R	-	-
Rubus idaeus	SH	0.90909091	3.0151134
Rubus idaeus	ST	-	-
Rubus idaeus	WT	-	-
Rubus sp	R	2.58333333	4.1281554
Rubus sp	SH	0.18181818	0.6030227
Rubus sp	ST	-	-
Rubus sp	WT	-	-
Rumex acetosa	R	0.33333333	0.8164966
Rumex acetosa	SH	0.09090909	0.3015113
Rumex acetosa	ST	-	-
Rumex acetosa	WT	-	-
Salix fragilis a	R	-	-
Salix fragilis a	SH	1.81818182	6.0302269
Salix fragilis a	ST	-	-
Salix fragilis a	WT	-	-
Salix fragilis b	R	-	-
Salix fragilis b	SH	1.81818182	6.0302269
Salix fragilis b	ST	2.50000000	7.0710678
Salix fragilis b	WT	-	-
Salix fragilis	R	-	-
Salix fragilis	SH	-	-
Salix fragilis	ST	1.25000000	3.5355339
Salix fragilis	WT	-	-
Salix purpurea b	R	0.83333333	2.0412415
Salix purpurea b	SH	-	-
Salix purpurea b	ST	1.25000000	3.5355339
Salix purpurea b	WT	-	-
Salix purpurea	R	-	-
Salix purpurea	SH	-	-
Salix purpurea	ST	-	-
Salix purpurea	WT	0.40000000	0.8944272
Sambucus nigra b	R	1.66666667	4.0824829
Sambucus nigra b	SH	0.90909091	3.0151134
Sambucus nigra b	ST	-	-
Sambucus nigra b	WT	-	-
Saponaria officinalis	R	0.16666667	0.4082483
Saponaria officinalis	SH	4.31818182	6.1166687
Saponaria officinalis	ST	3.50000000	6.8868405
Saponaria officinalis	WT	-	-
Senecio viscosus	R	-	-
Senecio viscosus	SH	2.63636364	3.9565825
Senecio viscosus	ST	2.87500000	6.9372185
Senecio viscosus	WT	-	-
Sisymbrium officinale	R	-	-
Sisymbrium officinale	SH	0.18181818	0.6030227
Sisymbrium officinale	ST	-	-
Sisymbrium officinale	WT	-	-
Solidago canadensis	R	-	-
Solidago canadensis	SH	-	-
Solidago canadensis	ST	-	-
Solidago canadensis	WT	0.10000000	0.2236068
Solidago gigantea	R	-	-
Solidago gigantea	SH	0.09090909	0.3015113
Solidago gigantea	ST	-	-
Solidago gigantea	WT	1.00000000	2.2360680
Sorbus aucuparia b	R	1.66666667	4.0824829
Sorbus aucuparia b	SH	-	-
Sorbus aucuparia b	ST	-	-
Sorbus aucuparia b	WT	-	-
Sorbus aucuparia	R	1.83333333	4.0207794
Sorbus aucuparia	SH	-	-
Sorbus aucuparia	ST	-	-
Sorbus aucuparia	WT	-	-
Stellaria holostea	R	1.66666667	4.0824829
Stellaria holostea	SH	-	-
Stellaria holostea	ST	-	-
Stellaria holostea	WT	-	-
Tanacetum vulgare	R	1.66666667	2.5819889
Tanacetum vulgare	SH	4.81818182	14.9987878
Tanacetum vulgare	ST	0.12500000	0.3535534
Tanacetum vulgare	WT	1.00000000	2.2360680
Torilis japonica	R	0.33333333	0.8164966
Torilis japonica	SH	-	-
Torilis japonica	ST	-	-
Torilis japonica	WT	-	-
Trifolium arvense	R	-	-
Trifolium arvense	SH	0.04545455	0.1507557
Trifolium arvense	ST	-	-
Trifolium arvense	WT	-	-
Tussilago farfara	R	-	-
Tussilago farfara	SH	0.27272727	0.6466698
Tussilago farfara	ST	0.12500000	0.3535534
Tussilago farfara	WT	-	-
Typha latifolia	R	-	-
Typha latifolia	SH	-	-
Typha latifolia	ST	-	-
Typha latifolia	WT	0.40000000	0.8944272
Urtica dioica	R	5.00000000	8.3666003
Urtica dioica	SH	0.09090909	0.3015113
Urtica dioica	ST	-	-
Urtica dioica	WT	-	-
Ranunculus sceleratus	R	-	-
Ranunculus sceleratus	SH	-	-
Ranunculus sceleratus	ST	-	-
Ranunculus sceleratus	WT	1.00000000	2.2360680
Ceratodon purpuerus	R	-	-
Ceratodon purpuerus	SH	-	-
Ceratodon purpuerus	ST	0.75000000	1.7525492
Ceratodon purpuerus	WT	0.80000000	1.0954451
Polytrichum piliferum	R	-	-
Polytrichum piliferum	SH	-	-
Polytrichum piliferum	ST	0.50000000	0.9258201
Polytrichum piliferum	WT	0.20000000	0.4472136
Hypnum cupressiforme	R	-	-
Hypnum cupressiforme	SH	-	-
Hypnum cupressiforme	ST	-	-
Hypnum cupressiforme	WT	0.20000000	0.4472136
Brachythecium salebrosum	R	-	-
Brachythecium salebrosum	SH	-	-
Brachythecium salebrosum	ST	0.62500000	1.7677670
Brachythecium salebrosum	WT	-	-
Cephalozia bicuspidata	R	-	-
Cephalozia bicuspidata	SH	-	-
Cephalozia bicuspidata	ST	0.12500000	0.3535534
Cephalozia bicuspidata	WT	-	-
Bryum caespiticum	R	-	-
Bryum caespiticum	SH	-	-
Bryum caespiticum	ST	0.25000000	0.7071068
Bryum caespiticum	WT	0.40000000	0.5477226
Niphotrichum canescens	R	-	-
Niphotrichum canescens	SH	-	-
Niphotrichum canescens	ST	-	-
Niphotrichum canescens	WT	0.20000000	0.4472136
